## P1025

**Incidence and characteristics of pulmonary vein reconnection after second-generation cryoballoon-based pulmonary vein isolation: Impact of different ablation strategies**

Heeger CH.<sup>1</sup>; Rexha ER.<sup>2</sup>; Maack SM.<sup>2</sup>; Rottner L.<sup>3</sup>; Fink T.<sup>1</sup>; Mathew SM.<sup>4</sup>; Maurer TM.<sup>2</sup>; Lemes CL.<sup>2</sup>; Rillig AR.<sup>3</sup>; Wohlmuth PW.<sup>2</sup>; Reissmann BR.<sup>3</sup>; Tilz RR.<sup>1</sup>; Ouyang FO.<sup>5</sup>; Kuck KHK<sup>1</sup>; Metzner AM.<sup>3</sup>

<sup>1</sup>University of Luebeck, Medical clinic II, Luebeck, Germany

<sup>2</sup>Asklepios Clinic St. Georg, Department of Cardiology, Hamburg, Germany

<sup>3</sup>University Heart Center Hamburg, Cardiology, Hamburg, Germany

<sup>4</sup>University hospital Giessen and Marburg, Cardiology, Giessen, Germany

<sup>5</sup>Fuwai Hospital, Cardiology, Beijing, China

**Funding Acknowledgements:** none

**Introduction:** The second-generation CB (CB2, Arctic Front Advance, Medtronic Inc., Minneapolis, USA) has demonstrated high procedural success rates, relatively short procedure times, high durability of PVI and convincing long-term clinical success rates. Nevertheless, data on the impact of different ablations protocols on durability after CB2 based PVI is limited.

**Purpose:** We aimed at comparing durability of pulmonary vein isolation (PVI) following three different ablation strategies utilizing the second-generation cryoballoon (CB2) in patients with recurrence of atrial fibrillation (AF) or atrial tachycardia (AT) undergoing repeat procedures.

**Methods:** In 192 patients a total of 751 PVs were identified. All PVs (751/751, 100%) were successfully isolated during index PVI. Thirty-one out of 192 (16%) patients were treated with a bonus-freeze protocol (group 1), 67/192 (35%) patients with a no bonus-freeze protocol (group 2), and 94/192 (49%) patients with a "time-to-effect"-guided ablation protocol without bonus freezes (group 3).

**Results:** Persistent PVI was documented in 419/751 (55.8%) PVs, and in 41/192 (21%) patients all PVs were persistently isolated. The number of patients with all PVs being persistently isolated was not significant between the groups ( $p = 0.594$ ). The total rate of PV reconnection was not significantly different between the three groups ( $p = 0.134$ ) and the comparison of individual PVs revealed also no differences for different ablation protocols ( $p$ -values for RSPV: 0.424, RIPV: 0.541, LSPV: 0.788, LIPV: 0.346, LCPV: 0.865). The procedure times were significantly reduced in non-bonus freeze ablation protocols and/or when applying individualized application times (group 1:  $123.4 \pm 31.5$  min, group 2:  $112.9 \pm 39.8$  min, group 3:  $86.67 \pm 28.4$  min,  $p < 0.001$ ).

**Conclusions:** A considerably high rate of persistent PVI was demonstrated in patients after index CB2-based PVI. No differences for durable PVI were detected for different ablation protocols. Therefore, individualized ablation protocols might be a beneficial ablation strategy during CB2-based PVI.
